# Supplementary material for: Vaccine Attitudes and COVID-19 Vaccine Intentions and Prevention Behaviors among Young People At-Risk for and Living with HIV in Los Angeles and New Orleans
Source: MDPI journal article supplement (doi:10.3390/vaccines10030413), 2022-03-09
Supplement: s1 [file s1]

## Supplementary Materials

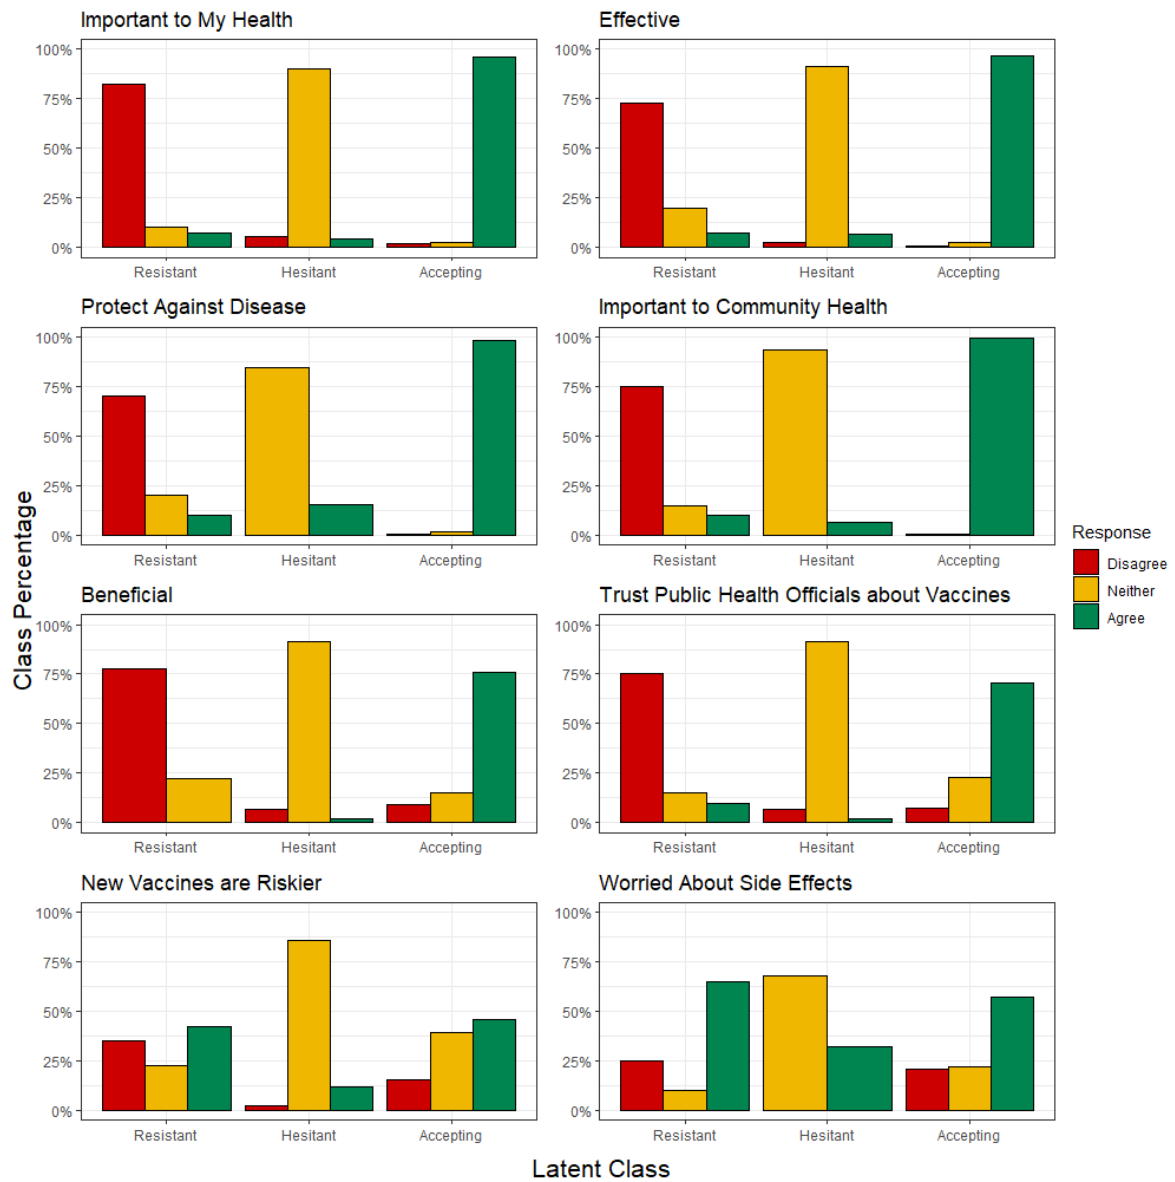

**Figure S1.** Responses to vaccine attitude questions by vaccine resistant, hesitant and accepting latent classes.

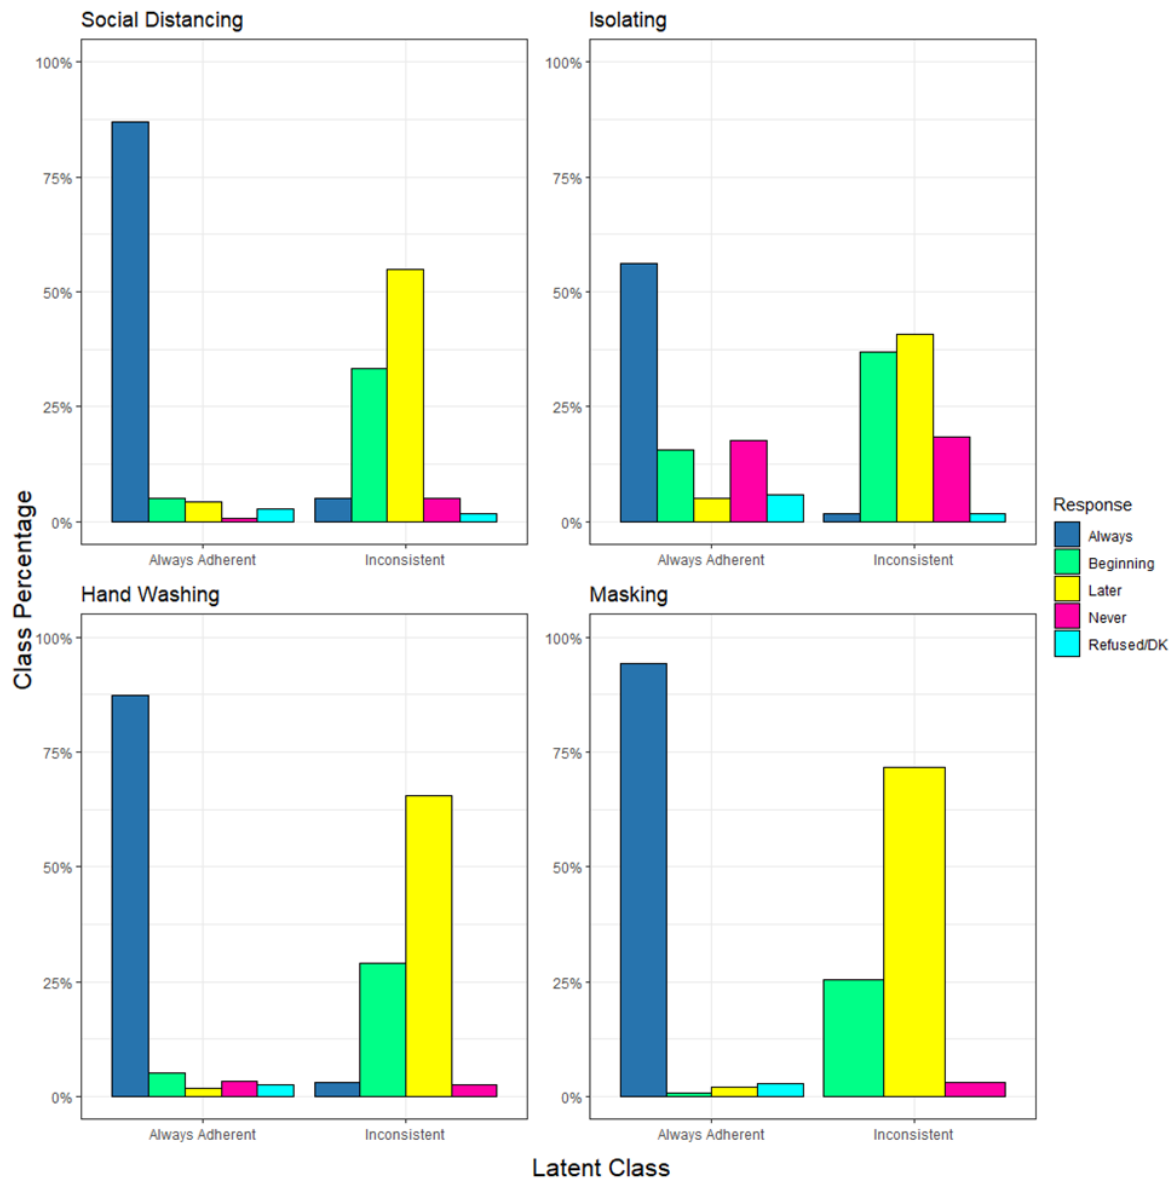

**Figure S2.** Responses to COVID-19 prevention behaviors questions by adherent and inconsistent latent classes.

**Table S1.** Multinomial logistic regression results examining factors associated with resistant/hesitant vs accepting and resistant vs hesitant/acceptance.

| Factor                             | Estimate (95% CI)     |
|------------------------------------|-----------------------|
| <b>Model: Resistant + Hesitant</b> |                       |
| Intercept                          | 0.010 (0.000, 0.794)  |
| Latine                             | 1.221 (0.475, 3.140)  |
| Other                              | 1.269 (0.215, 7.504)  |
| White                              | 1.059 (0.208, 5.391)  |
| Cis-Women                          | 2.728 (0.862, 8.633)  |
| Nonconforming/Other                | 5.677 (0.594, 54.265) |
| Trans-Female                       | 4.138 (0.404, 42.329) |
| Trans-Male                         | 1.009 (0.161, 6.345)  |
| Gay                                | 1.424 (0.511, 3.964)  |
| Hetero                             | 0.506 (0.165, 1.551)  |
| Pan/A/Queer/Other                  | 0.943 (0.166, 5.352)  |
| Substance Abuse Program            | 0.355 (0.115, 1.096)  |

|                                     |                       |
|-------------------------------------|-----------------------|
| Hospitalized for Mental Health      | 0.812 (0.322, 2.048)  |
| Ever Incarcerated                   | 1.362 (0.457, 4.060)  |
| Homeless Lifetime                   | 1.039 (0.413, 2.615)  |
| Monthly Income (\$100)              | 0.995 (0.960, 1.032)  |
| Age (Years)                         | 1.247 (1.030, 1.508)  |
| <b>Model: Resistant + Accepting</b> |                       |
| Intercept                           | 0.330 (0.007, 15.555) |
| Latino                              | 2.919 (1.237, 6.887)  |
| Other                               | 5.538 (1.136, 27.000) |
| White                               | 5.837 (1.460, 23.339) |
| Cis-Women                           | 1.000 (0.321, 3.113)  |
| Nonconforming/Other                 | 1.994 (0.218, 18.226) |
| Trans-Female                        | 2.667 (0.299, 23.787) |
| Trans-Male                          | 0.312 (0.059, 1.644)  |
| Gay                                 | 1.877 (0.746, 4.722)  |
| Hetero                              | 0.454 (0.156, 1.318)  |
| Pan/A/Queer/Other                   | 3.538 (0.730, 17.156) |
| Substance Abuse Program             | 0.442 (0.158, 1.235)  |
| Hospitalized for Mental Health      | 0.751 (0.318, 1.774)  |
| Ever Incarcerated                   | 1.217 (0.421, 3.515)  |
| Homeless Lifetime                   | 0.382 (0.163, 0.893)  |
| Monthly Income (\$100)              | 1.005 (0.972, 1.038)  |
| Age (Years)                         | 1.121 (0.944, 1.332)  |
